# Supplementary material for: Amelioration of Alcoholic Liver Disease by Activating PXR-Cytochrome P450s Axis with Blackberry Extract
Source: MDPI journal article supplement (doi:10.3390/separations9100321), 2022-10-21
Supplement: s1 [file s1]

**Figure Captions**

**Figure S1** Network pharmacology Diagram of Cyanidin-3-*O*-glucoside.(A) Related targets of cyanidin-3-*O*-glucoside, the green circular and red polygons respectively represented cyanidin-3-*O*-glucoside -targeted genes and cyanidin-3-*O*-glucoside. (B) Venn map of cyanidin-3-*O*-glucoside target and ALD target.

**Table S1.** Shared target information of cyanidin-3-*O*-glucoside.

**Figure S2.** PPI network of the intersection target of cyanidin-3-*O*-glucoside for ALD.

**Figure S3.** Histogram of Go analysis of cyanidin-3-*O*-glucoside (A) The enriched terms in biological process (BP); (B) The enriched terms in cellular component (CC); (C) The enriched terms in molecular function (MF).

**Figure S4** KEGG pathway diagram of cyanidin-3-*O*-glucoside.

**Figure S5.** “Component-target-pathway-disease” network diagram.

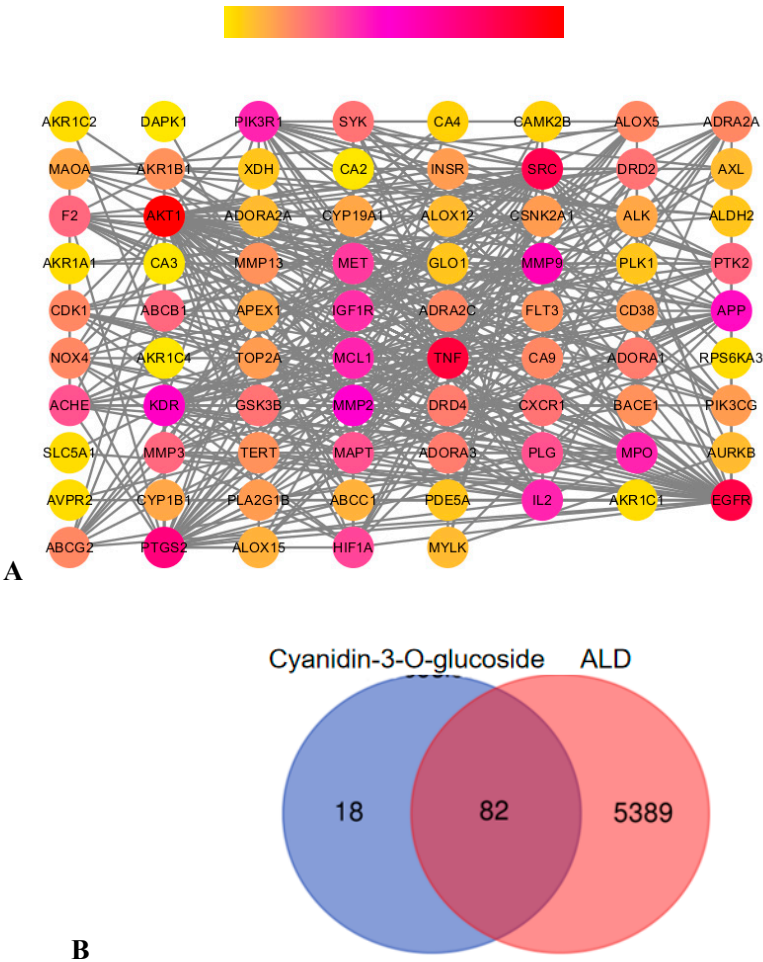

**Figure S1.** Network pharmacology Diagram of Cyanidin-3-*O*-glucoside.(A) Related targets of cyanidin-3-*O*-glucoside, the green circular and red polygons respectively represented cyanidin-3-*O*-glucoside -targeted genes and cyanidin-3-*O*-glucoside. (B) Venn map of cyanidin-3-*O*-glucoside target and ALD target.

**Table S1.** Shared target information of cyanidin-3-O-glucoside

| No | Target                                                      | Symbol  | No | Target                                        | Symbol  |
|----|-------------------------------------------------------------|---------|----|-----------------------------------------------|---------|
| 1  | Lymphocyte differentiation antigen CD38                     | CD38    | 42 | DNA topoisomerase II alpha                    | TOP2A   |
| 2  | NADPH oxidase 4                                             | NOX4    | 43 | Monoamine oxidase A                           | MAOA    |
| 3  | Aldose reductase                                            | AKR1B1  | 44 | Insulin-like growth factor I receptor         | IGF1R   |
| 4  | Adrenergic receptor alpha-2                                 | ADRA2C  | 45 | Tyrosine-protein kinase receptor FLT3         | FLT3    |
| 5  | Carbonic anhydrase II                                       | CA2     | 46 | Cytochrome P450 19A1                          | CYP19A1 |
| 6  | Carbonic anhydrase IV                                       | CA4     | 47 | Insulin receptor                              | INSR    |
| 7  | Acetylcholinesterase                                        | ACHE    | 48 | Serine/threonine-protein kinase Aurora-B      | AURKB   |
| 8  | Alpha-2a adrenergic receptor                                | ADRA2A  | 49 | Dopamine D4 receptor                          | DRD4    |
| 9  | Ribosomal protein S6 kinase alpha 3                         | RPS6KA3 | 50 | Myosin light chain kinase, smooth muscle      | MYLK    |
| 10 | Cyclooxygenase-2                                            | PTGS2   | 51 | Myeloperoxidase                               | MPO     |
| 11 | Xanthine dehydrogenase                                      | XDH     | 52 | PI3-kinase p85-alpha subunit                  | PIK3R1  |
| 12 | Phosphodiesterase 5A                                        | PDE5A   | 53 | Death-associated protein kinase 1             | DAPK1   |
| 13 | TNF-alpha                                                   | TNF     | 54 | Liver glycogen phosphorylase                  | PYGL    |
| 14 | Interleukin-2                                               | IL2     | 55 | Tyrosine-protein kinase SYK                   | SYK     |
| 15 | Adenosine A1 receptor (by homology)                         | ADORA1  | 56 | Glycogen synthase kinase-3 beta               | GSK3B   |
| 16 | Arachidonate 5-lipoxygenase                                 | ALOX5   | 57 | Focal adhesion kinase 1                       | PTK2    |
| 17 | Carbonic anhydrase I                                        | CA1     | 58 | Vascular endothelial growth factor receptor 2 | KDR     |
| 18 | Carbonic anhydrase IX                                       | CA9     | 59 | Matrix metalloproteinase 13                   | MMP13   |
| 19 | Aldehyde dehydrogenase                                      | ALDH2   | 60 | Matrix metalloproteinase 3                    | MMP3    |
| 20 | Telomerase reverse transcriptase                            | TERT    | 61 | Carbonic anhydrase III                        | CA3     |
| 21 | Plasminogen                                                 | PLG     | 62 | Arachidonate 15-lipoxygenase                  | ALOX15  |
| 22 | ATP-binding cassette sub-family G member 2                  | ABCG2   | 63 | Serine/threonine-protein kinase PLK1          | PLK1    |
| 23 | Adenosine A3 receptor                                       | ADORA3  | 64 | Cyclin-dependent kinase 1                     | CDK1    |
| 24 | Thrombin                                                    | F2      | 65 | Matrix metalloproteinase 9                    | MMP9    |
| 25 | Glyoxalase I                                                | GLO1    | 66 | PI3-kinase p110-gamma subunit                 | PIK3CG  |
| 26 | LXR-alpha                                                   | NR1H3   | 67 | Matrix metalloproteinase 2                    | MMP2    |
| 27 | Beta amyloid A4 protein                                     | APP     | 68 | Casein kinase II alpha                        | CSNK2A1 |
| 28 | Tyrosine-protein kinase SRC                                 | SRC     | 69 | Arachidonate 12-lipoxygenase                  | ALOX12  |
| 29 | Cytochrome P450 1B1                                         | CYP1B1  | 70 | Hepatocyte growth factor receptor             | MET     |
| 30 | Sodium/glucose cotransporter 2                              | SLC5A2  | 71 | Interleukin-8 receptor A                      | CXCR1   |
| 31 | Induced myeloid leukemia cell differentiation protein Mcl-1 | MCL1    | 72 | CaM kinase II beta                            | CAMK2B  |
| 32 | Sodium/glucose cotransporter 1                              | SLC5A1  | 73 | ALK tyrosine kinase receptor                  | ALK     |

|    |                                         |       |    |                                      |        |
|----|-----------------------------------------|-------|----|--------------------------------------|--------|
| 33 | Hypoxia-inducible factor 1 alpha        | HIF1A | 74 | Serine/threonine-protein kinase AKT  | AKT1   |
|    | Multidrug resistance-associated protein |       |    |                                      | PLA2G1 |
| 34 | 1                                       | ABCC1 | 75 | Phospholipase A2 group 1B            | B      |
| 35 | P-glycoprotein 1 (by homology)          | ABCB1 | 76 | Beta-secretase 1                     | BACE1  |
|    |                                         | SIGMA |    |                                      |        |
| 36 | Sigma opioid receptor                   | R1    | 77 | Tyrosine-protein kinase receptor UFO | AXL    |
|    |                                         |       |    | DNA-(apurinic or apyrimidinic site)  |        |
| 37 | Dopamine D2 receptor (by homology)      | DRD2  | 78 | lyase                                | APEX1  |
|    | Epidermal growth factor receptor        |       |    | Aldo-keto reductase family 1 member  |        |
| 38 | erbB1                                   | EGFR  | 79 | C2 (by homology)                     | AKR1C2 |
|    |                                         | ADORA |    | Aldo-keto reductase family 1 member  |        |
| 39 | Adenosine A2a receptor (by homology)    | 2A    | 80 | C1 (by homology)                     | AKR1C1 |
|    |                                         |       |    | Aldo-keto reductase family 1 member  |        |
| 40 | Microtubule-associated protein tau      | MAPT  | 81 | C4 (by homology)                     | AKR1C4 |
| 41 | Vasopressin V2 receptor                 | AVPR2 | 82 | Aldehyde reductase (by homology)     | AKR1A1 |

---



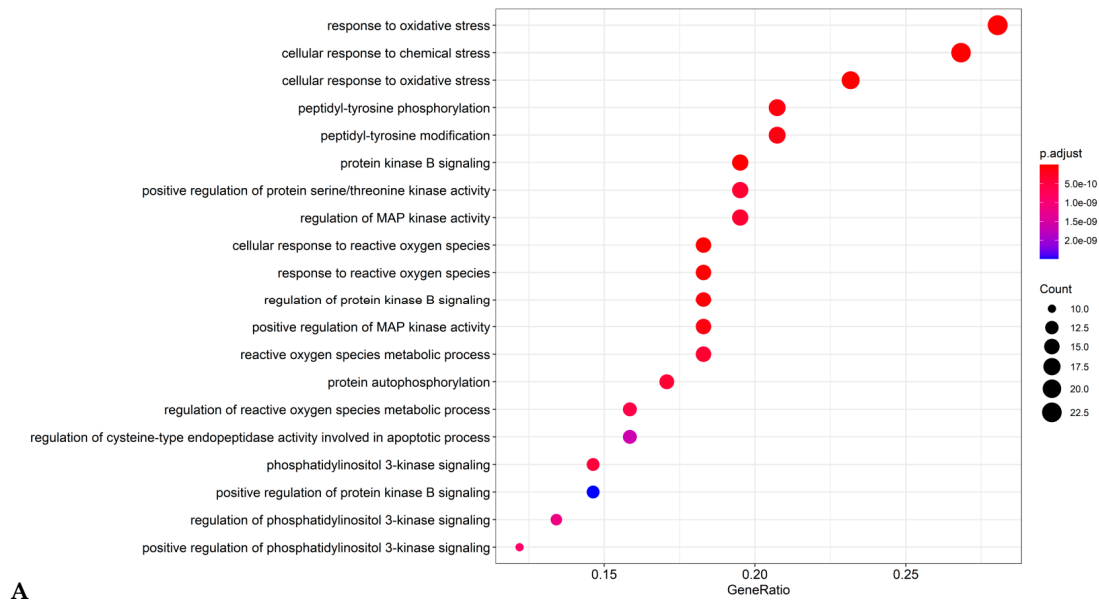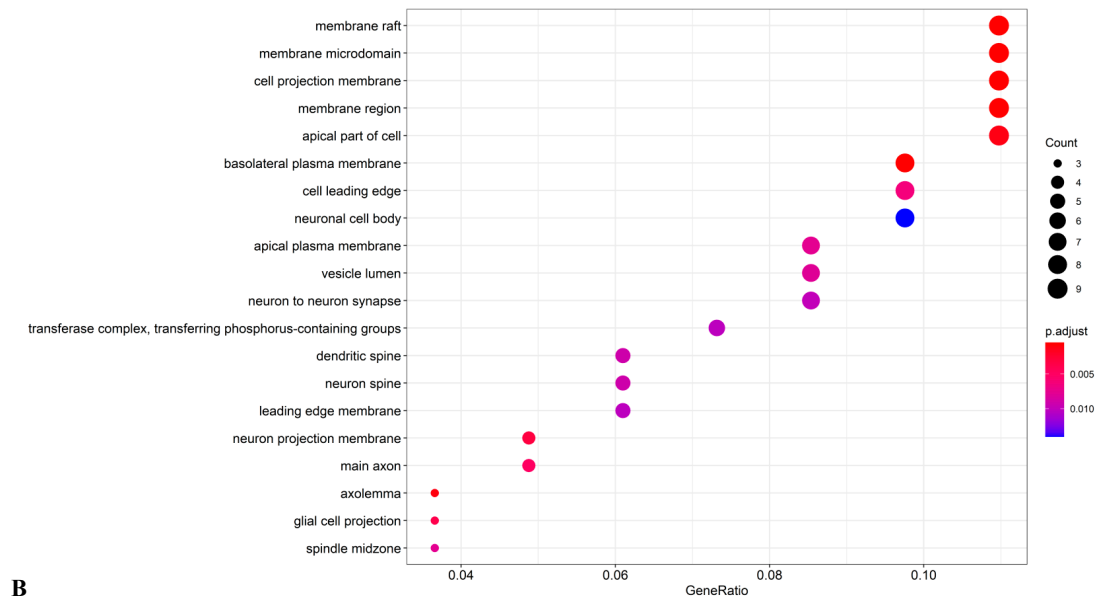

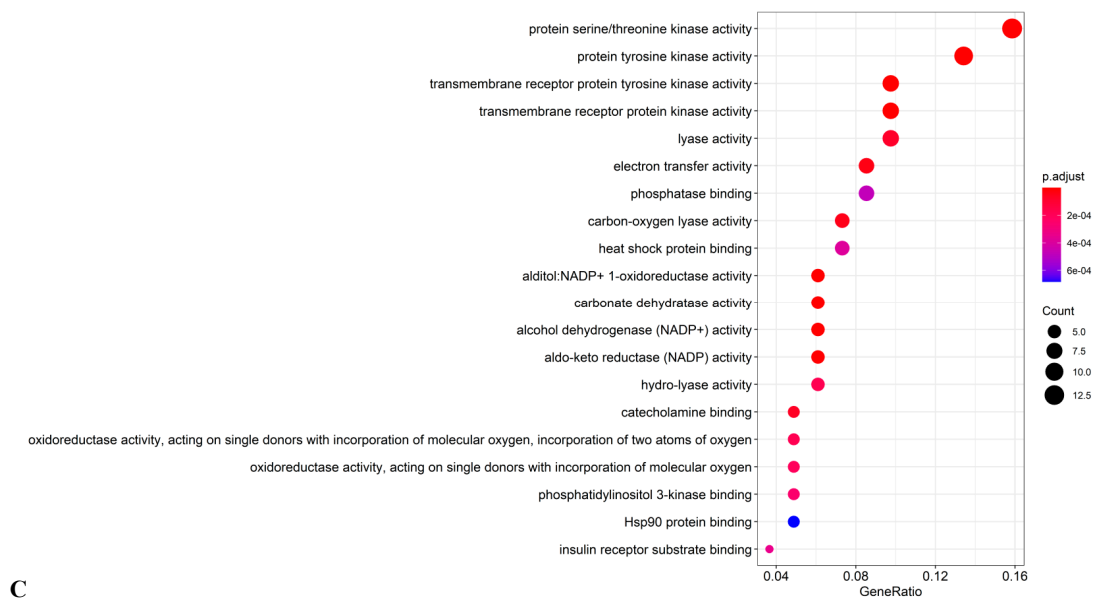

**Figure S3.** Histogram of Go analysis of cyanidin-3-*O*-glucoside (A) The enriched terms in biological process (BP); (B) The enriched terms in cellular component (CC); (C) The enriched terms in molecular function (MF).

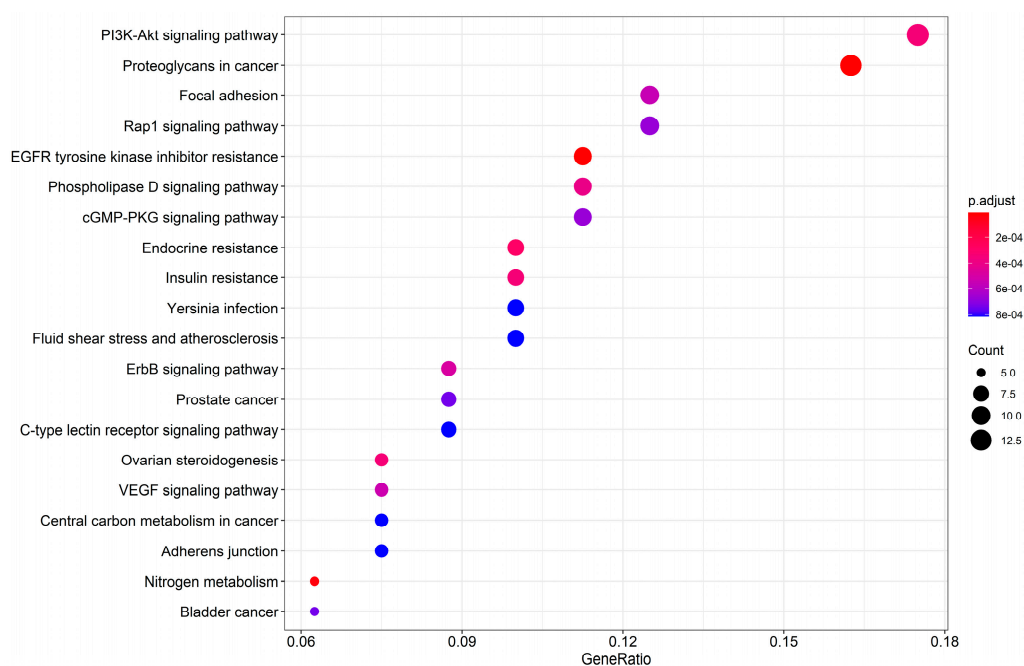

**Figure S4** KEGG pathway diagram of cyanidin-3-*O*-glucoside.

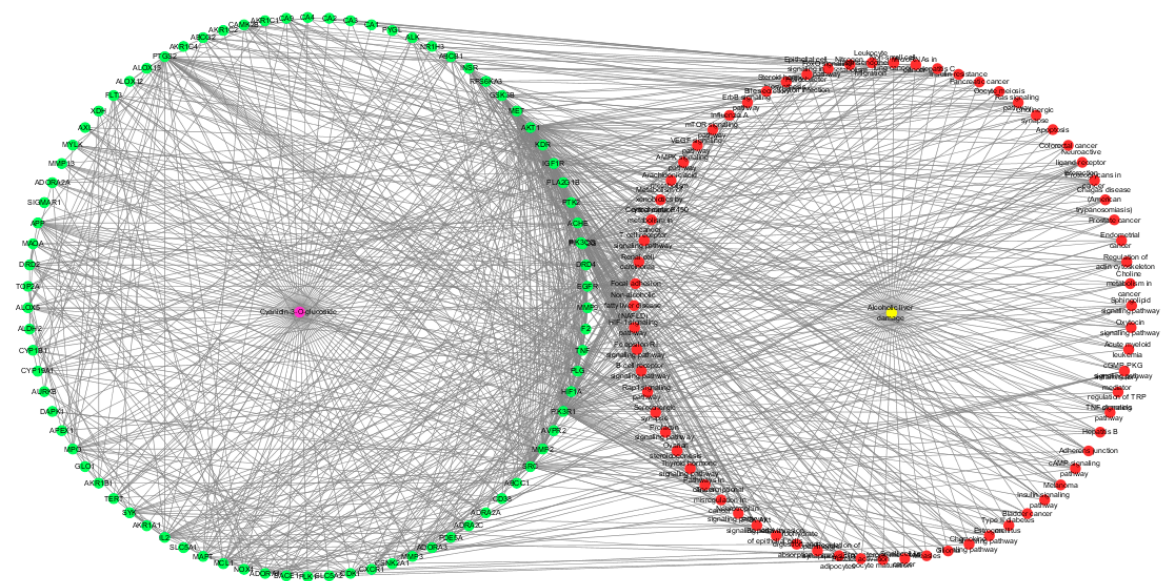

**Figure S5.** “Component-target-pathway-disease” network diagram.
